# Supplementary material for: The effect of pore sizes on D2/H2 separation conducted by MOF-74 analogues
Source: Royal Society of Chemistry journal article supplement (doi:10.1039/d2qi00156j), 2022-01-01
Supplement: d2qi00156j1.pdf [file d2qi00156j1.pdf]

## Support Information

### The Effect of Pore Sizes on D<sub>2</sub>/H<sub>2</sub> Separation Conducted by MOF-74 Analogue

Liqiong Li,<sup>a,b</sup> Chunqing Ji,<sup>b,c</sup> Wenjing Wang,<sup>b</sup> Fan Wu,<sup>b</sup> Yan-Xi Tan<sup>\*,a,b</sup> and Daqiang Yuan<sup>\*,a,b</sup>

<sup>a</sup> College of Chemistry, Fuzhou University, Fuzhou, 350108, China.

<sup>b</sup> State Key Laboratory of Structural Chemistry, Fujian Institute of Research on the Structure of Matter, Chinese Academy of Sciences, Fuzhou, 350002, Fujian, China.

<sup>c</sup> University of the Chinese Academy of Sciences, Beijing, 100049, China.

\* Corresponding author.

E-mail: [tyx@fjirsm.ac.cn](mailto:tyx@fjirsm.ac.cn); [ydq@fjirsm.ac.cn](mailto:ydq@fjirsm.ac.cn)

## 1. IAST selectivity calculations

The dual-site Langmuir equation (DSL) was used to fit the hydrogen and deuterium adsorption isotherms of Ni<sub>2</sub>(dobdc), Ni<sub>2</sub>(dobpdc), Ni<sub>2</sub>(olz) and Ni<sub>2</sub>(dotpdc) frameworks at 77 K and 87 K, respectively. Equation is given by:

$$N = A_1 \frac{b_1 \times P}{1 + b_1 \times P} + A_2 \frac{b_2 \times P}{1 + b_2 \times P} \quad (1)$$

where  $N$  represents the adsorbed amount per mass of adsorbent in mmol·g<sup>-1</sup>,  $A_1$  and  $A_2$  are the adsorption saturation capacity for site 1 and site 2 in mmol/g, respectively.  $b_1$  and  $b_2$  are dimensionless Langmuir parameters for site 1 and site 2, and  $P$  represents the pressure of the bulk at equilibrium with the adsorbed phase in kPa. The fitting of H<sub>2</sub> and D<sub>2</sub> sorption isotherms are given in **Fig. S6–S9**.

Using the ideal adsorption solution theory (IAST)<sup>1</sup>, the adsorption capacity of the binary mixture can be estimated from the pure gas adsorption isotherm, and then the selectivity can be calculated.  $S$  is defined according to the following formula:

$$S = \frac{x_1/x_2}{y_1/y_2} \quad (2)$$

where  $S$  is the IAST selectivity,  $x_1$  and  $x_2$  represent the equilibrium adsorption capacity of component 1 and component 2,  $y_1$  and  $y_2$  represent the molar ratio of component 1 and component 2 in the original mixed gas.

## 2. Isotheric heat of adsorption calculations

The Clausius-Clapeyron equation was used to estimate the isosteric heat of adsorption:

$$Q_{st} = RT^2 \left( \frac{\partial \ln p}{\partial T} \right)_q$$

Where  $Q_{st}$  (kJ·mol<sup>-1</sup>) is the isosteric heat of adsorption at a specific surface loading of adsorbate,  $R$  (kJ·mol<sup>-1</sup>·K<sup>-1</sup>) is the universal gas constant,  $T$  (K) is the temperature,  $p$  (kPa) is the pressure, and  $q$  (mmol·g<sup>-1</sup>) is the adsorbate amount adsorbed on the surface. Before using this equation, it is necessary to obtain the exact pressure

corresponding to a certain adsorption amount, therefore, we first use the dual-site Langmuir-Freundlich (DSLFF) equation to fit the single-component adsorption equilibrium isotherm, and then calculate the adsorption enthalpy based on the data points on the fitted curve. The calculated value of adsorption enthalpy is slightly different from that reported in the previous literature, which may be caused by the difference in test conditions and fitting methods. The calculation results are given in **Table S1**.

**Table S1** Isothermic heat of adsorption for D<sub>2</sub> (red) and H<sub>2</sub> (blue) as a function of coverage for Ni<sub>2</sub>(dobdc), Ni<sub>2</sub>(dobpdc), Ni<sub>2</sub>(olz) and Ni<sub>2</sub>(dotpdc).

| Adsorption enthalpy (KJ/mol) | Ni <sub>2</sub> (dobdc) | Ni <sub>2</sub> (dobpdc) | Ni <sub>2</sub> (olz) | Ni <sub>2</sub> (dotpdc) |
|------------------------------|-------------------------|--------------------------|-----------------------|--------------------------|
| H <sub>2</sub>               | 11.8                    | 11                       | 11.8                  | 11.1                     |
| D <sub>2</sub>               | 13.8                    | 12.9                     | 12.9                  | 12.6                     |

### 3. Additional diagrams

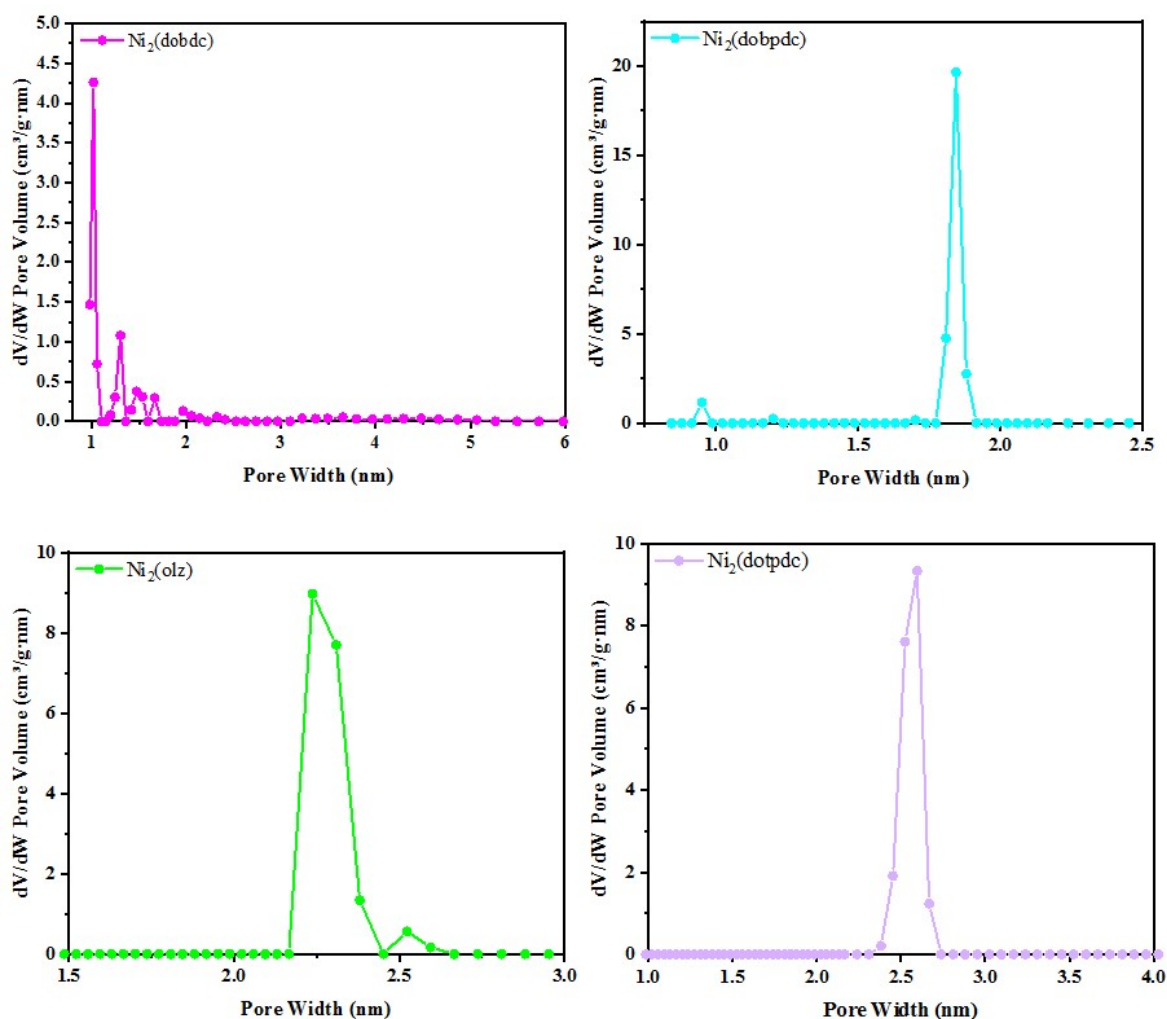

**Fig. S1** The pore size distributions of Ni<sub>2</sub>(dobdc), Ni<sub>2</sub>(dobpdc), Ni<sub>2</sub>(olz) and Ni<sub>2</sub>(dotpdc) frameworks were analysed using the NLDFT method.

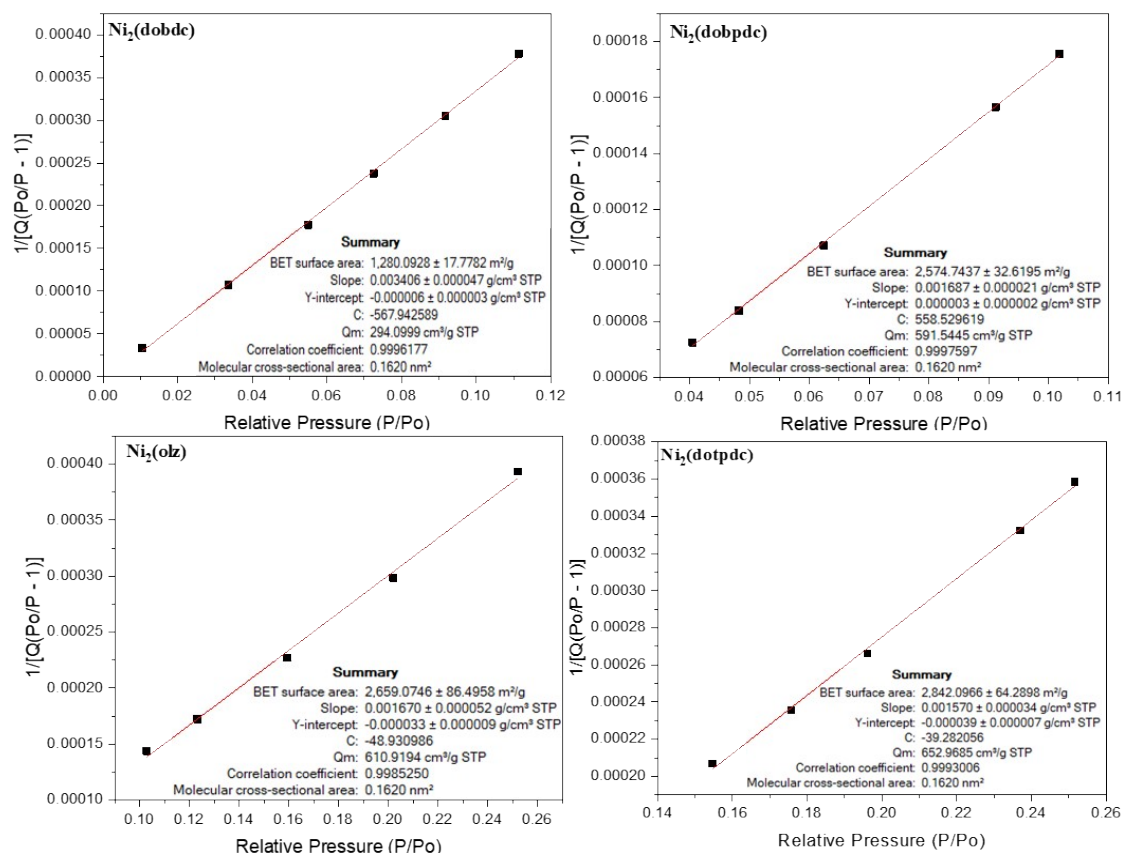

**Fig. S2** BET linear fits of Ni<sub>2</sub>(dobdc), Ni<sub>2</sub>(dobpdc), Ni<sub>2</sub>(olz) and Ni<sub>2</sub>(dotpdc).

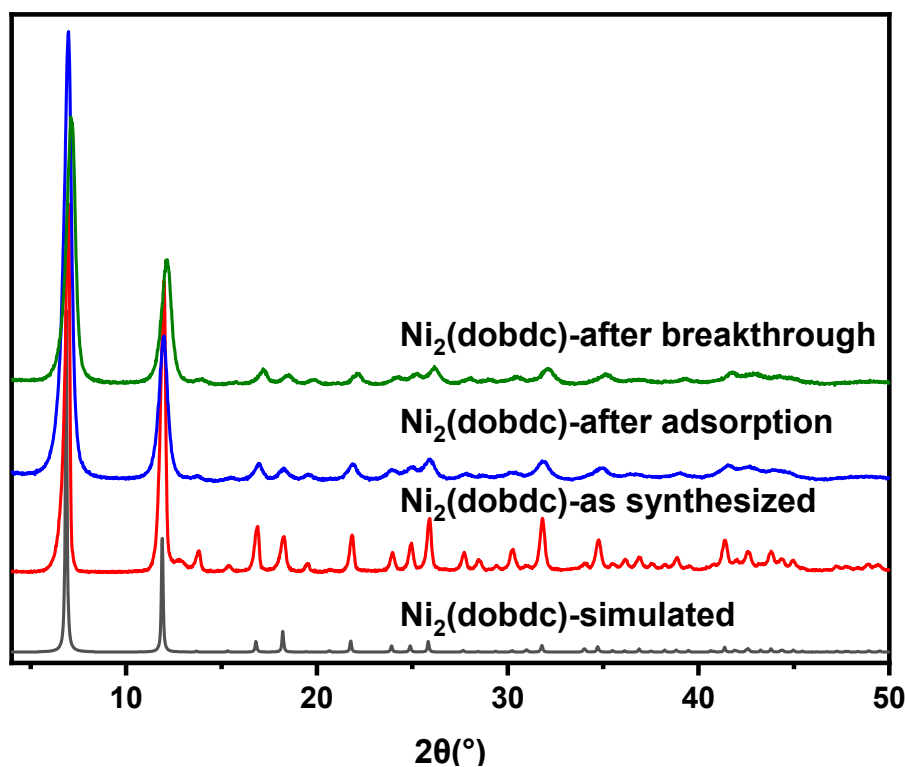

Fig. S3 PXRD patterns of  $\text{Ni}_2(\text{dobdc})$ .

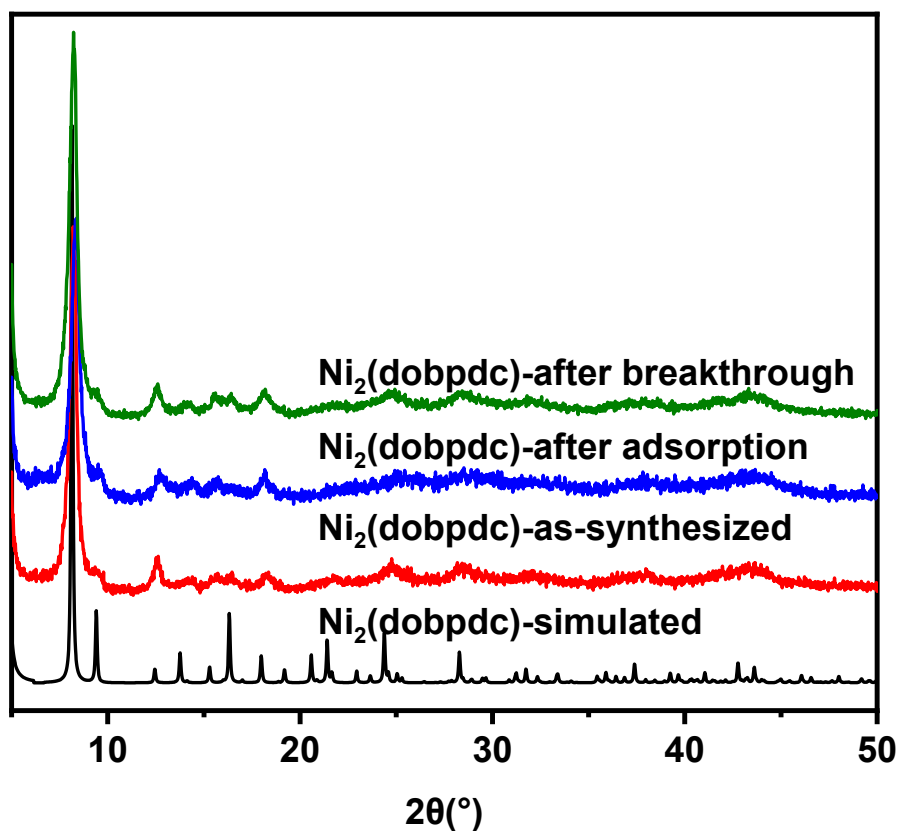

Fig. S4 PXRD patterns of  $\text{Ni}_2(\text{dobpdc})$

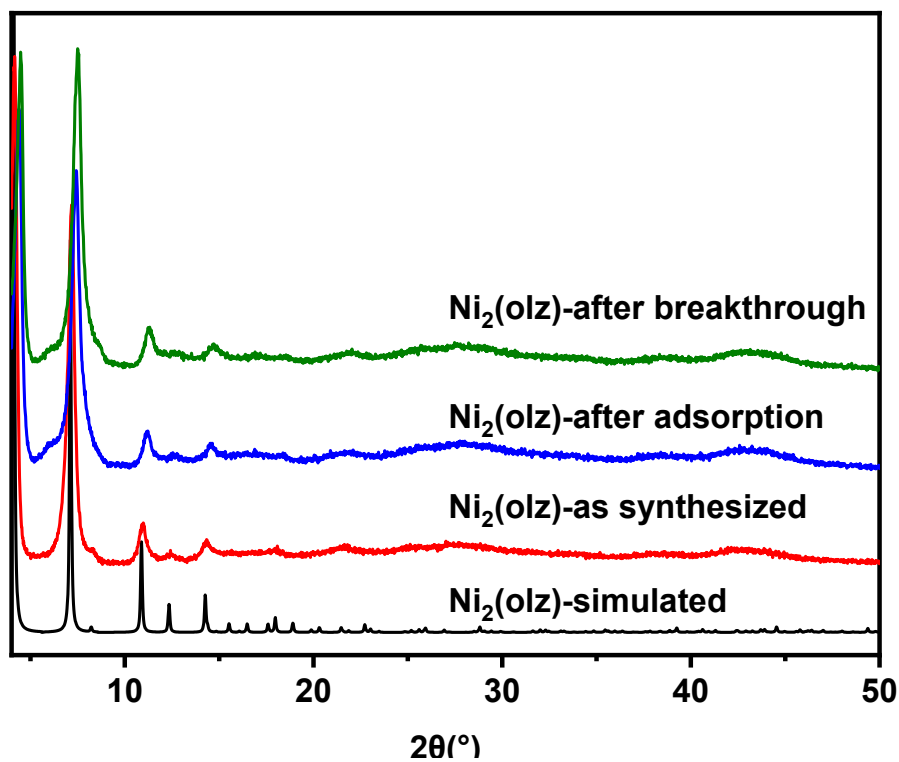

Fig. S5 PXRD patterns of Ni<sub>2</sub>(olz).

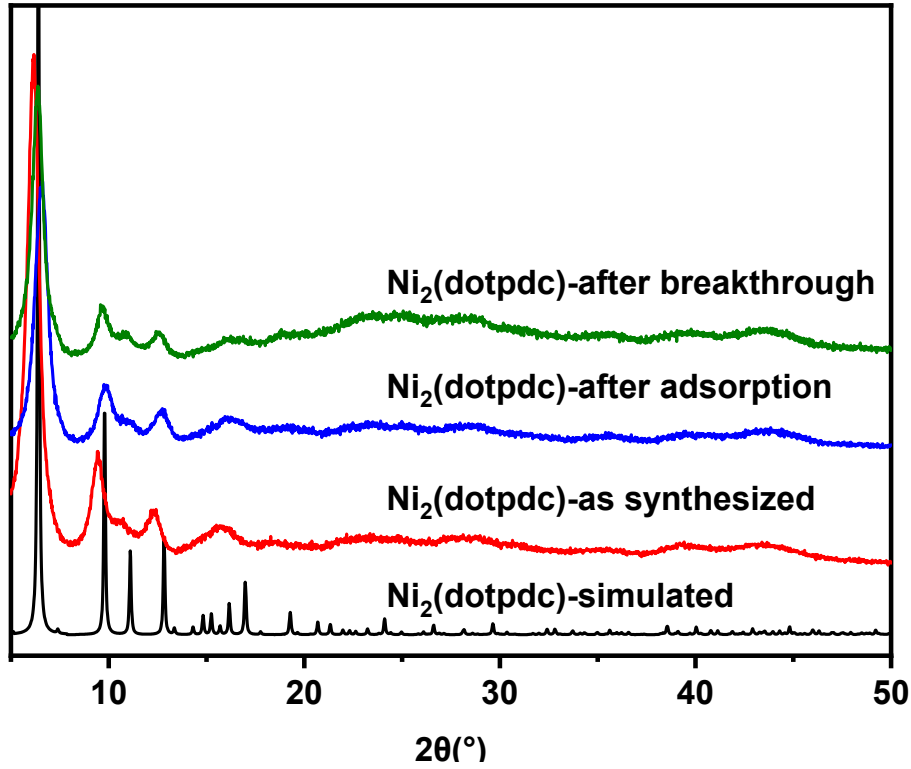

Fig. S6 PXRD patterns of Ni<sub>2</sub>(dotpdc).

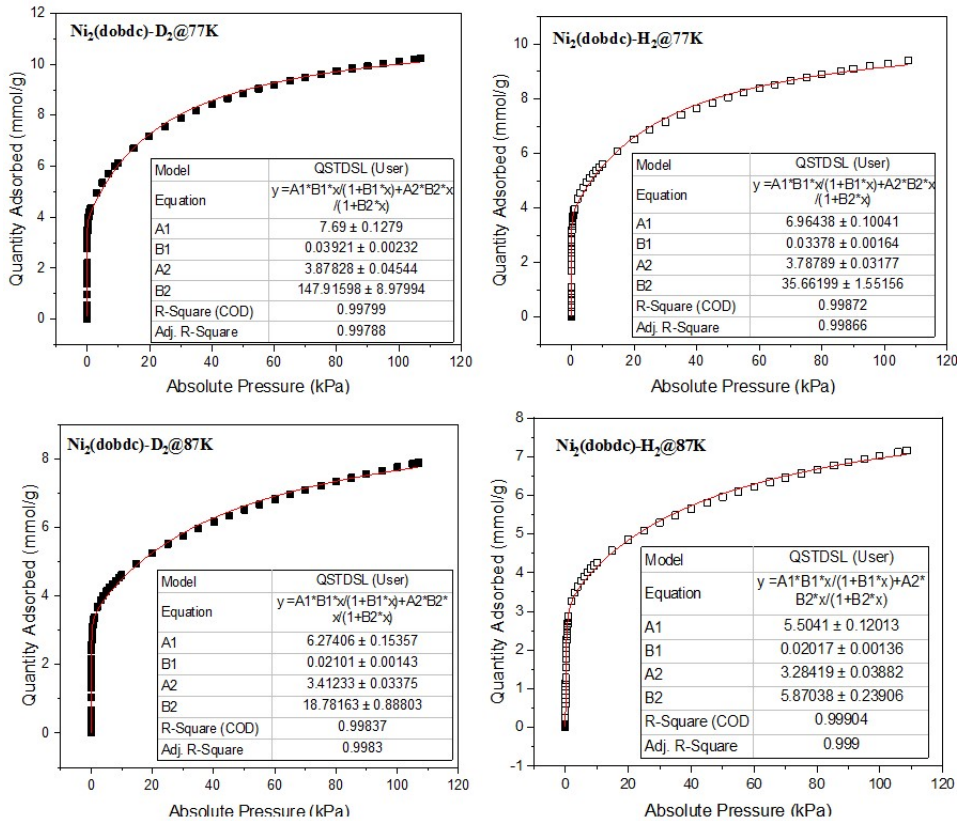

**Fig. S7** The dual-site Langmuir fitting of pure-component isotherm for Ni<sub>2</sub>(dobpdc).

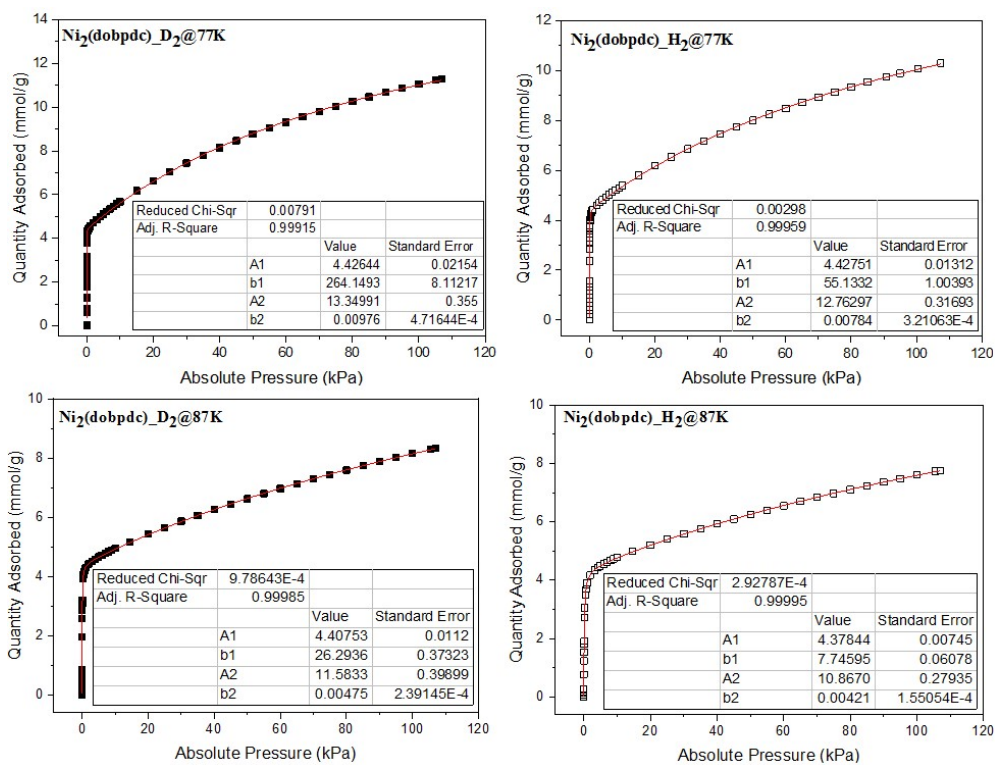

**Fig. 8** The dual-site Langmuir fitting of pure-component isotherm for Ni<sub>2</sub>(dobpdc).

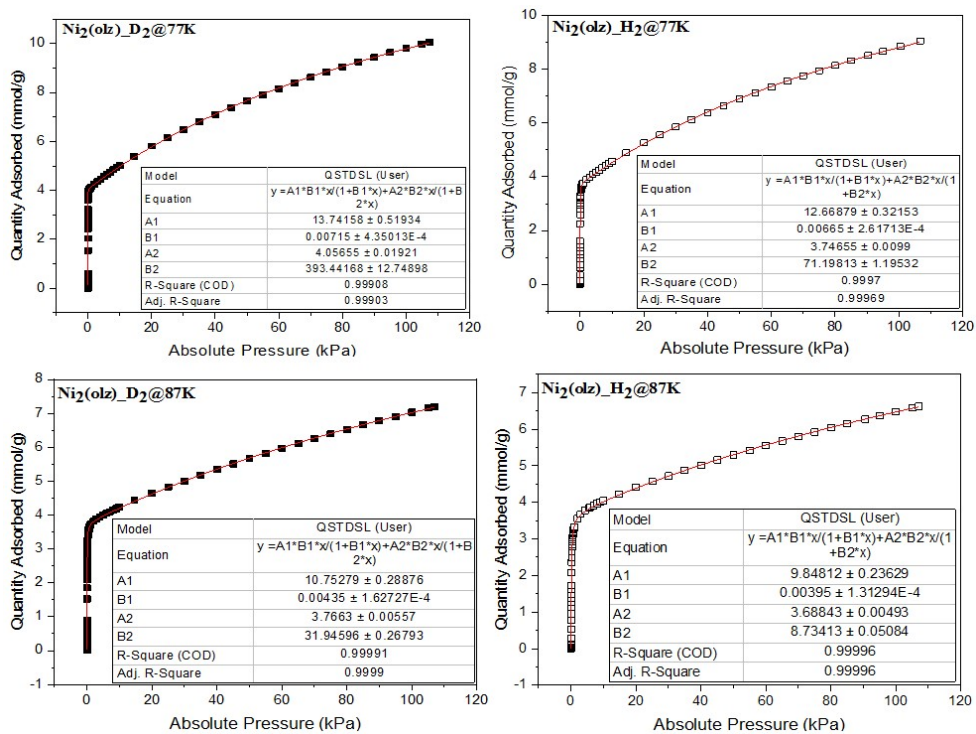

**Fig. S9** The dual-site Langmuir fitting of pure-component isotherm for Ni<sub>2</sub>(olz).

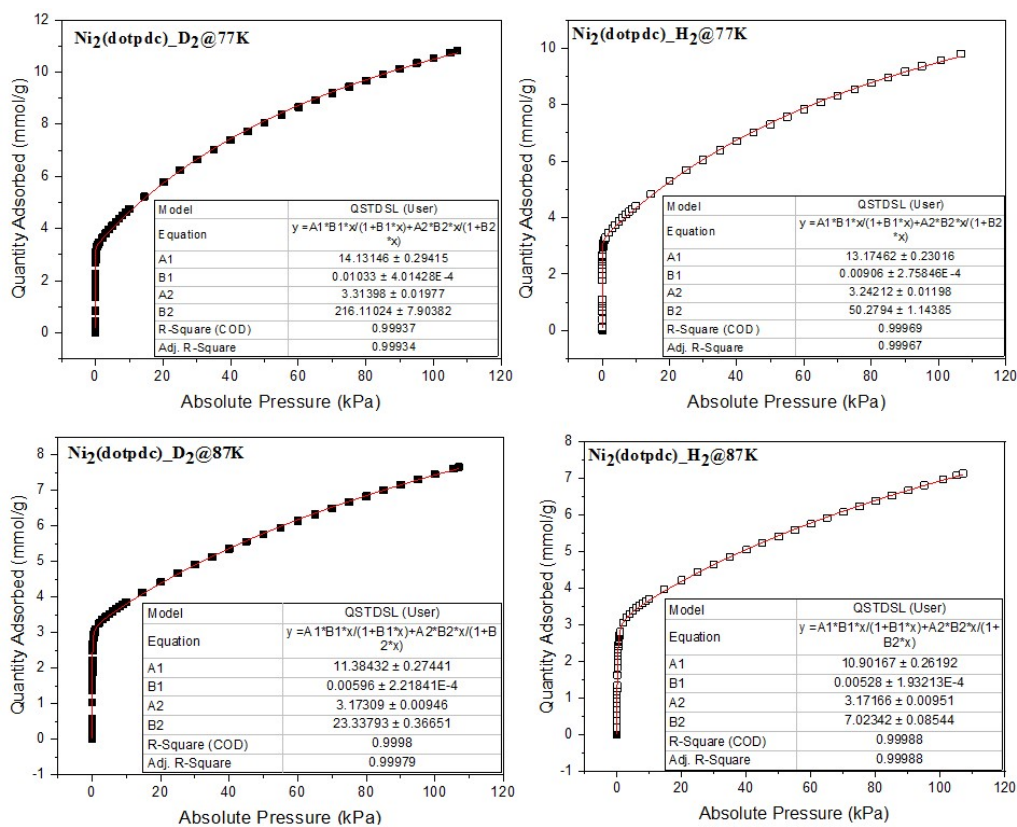

**Fig. S10** The dual-site Langmuir fitting of pure-component isotherm for Ni<sub>2</sub>(dotpdc).

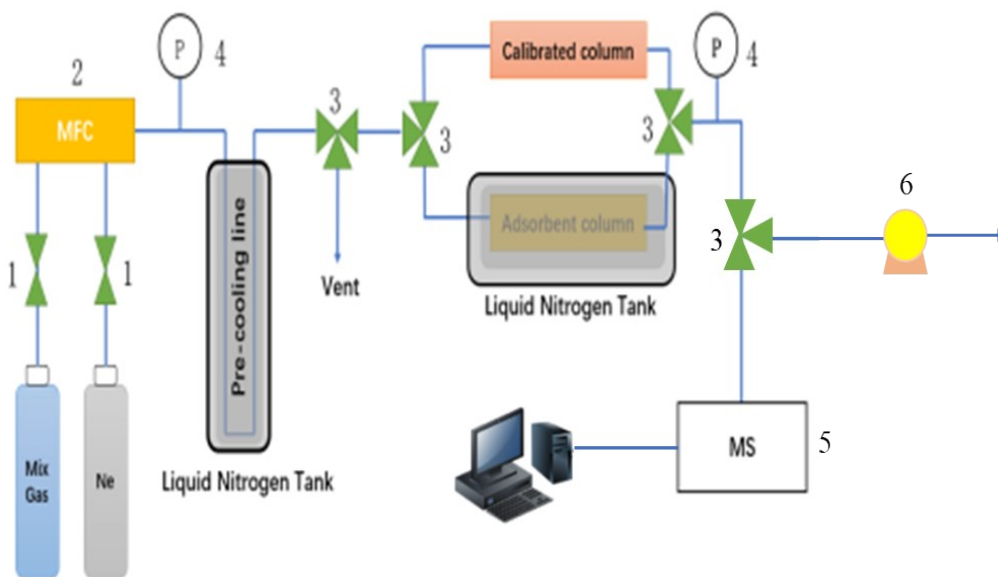

**Fig. S11** Schematic illustration of the breakthrough setup used in this study.

1. cylinder two-way valve; 2. gas mass flow controller; 3. three-way valve; 4. pressure gauge; 5. mass spectrometer; 6 vacuum pump.
